# Supplementary material for: Creating Novel School-Based Education Programs to Cultivate Mindfulness in Youth: What The Letters Told Us
Source: Springer Nature journal article supplement (doi:10.1007/s10826-017-0761-1), 2017-06-05
Supplement: MOESM2 [file 12337366]

Supplementary Material 2.

Note: Theoretical sampling as an accepted analytical process in qualitative research.

This note provides further explanation regarding the use of theoretical sampling, and the way it is incorporated in the data analysis, serving as data in its own right.

As part of the theoretical sampling process, a key component of data analysis (and used in the current study) is to use theoretical coding strategies to code the literature that would serve as an additional data source (Glaser, 1978, 1992, 1998). Charmaz, Thornberg, and Keane (2015) provide an understanding of theoretical coding as follows:

Whereas initial and focused codes are primarily created from the data, theoretical codes consist of ideas, terms, logics, abstract models, and perspectives that organize and integrate the analysis into a coherent theory. Theoretical codes refer to underlying logics that could be found embedded in preexisting theories. For some grounded theorists, theoretical codes simply extend and sharpen the lines of analysis already in the analysis. Other grounded theorists import them from outside the research process. In either case, the researcher must establish that the theoretical codes fit the analysis through making constant comparisons between these codes, data, and empirically generated codes, categories, and memos (p. 310).

Coyne and Cowley (2010) in their book, *Understanding and Evaluating Qualitative Educational Research* also build a foundation for using theoretical coding of the literature in the data analysis and results. In the following passage, Coyne and Cowley provide guidance and exemplar studies/examples of how this selective sampling of the literature has contributed to knowledge creation:

The literature is searched for different insights or ideas about some of the categories in order to develop and extend the categories. The literature was used to further the process of constant comparative analysis, through seeking similarities and differences to the categories identified in this study, thus acting as a secondary source of data by forming another comparison group with the data. For example, the category of ‘being there’ was developed through comparison with nursing literature on presencing (Gilje, 1992; Taylor, 1994; cited in Coyne and Cowley, 2010), and caring (Morse et al., 1990; Gaut, 1992; McCance et al., 1997; Edwards, 2001; cited in Coyne and Cowley, 2010). This literature revealed that there were different meanings to the category ‘being there’; it had links to issue of trusting and that there were different dimensions to ‘being there,’ such as being there as a reliable presence rather than just being present on the ward. This information enhanced understanding of the data from the parents in relation to their presence on the ward, and guided the inquiry process in further interviews with nurses and parents (p. 72-3).

The above passage parallels the strategy and process of theoretical sampling and theoretical coding that was used in the current study. For example, one of the categories we identified, “We are more of a community”, was constructed through comparisons with the education literature, which identified the importance of building a community and creating a sense of belonging among schoolchildren.

**References**

Charmaz, K. C., Thornberg, R., & Keane, E. (2015). Evolving grounded theory and social justice inquiry. In N. K. Denzin & Y. S. Lincoln (Eds.), The SAGE Handbook of Qualitative Research (5th Ed.), pp. 411-443. Thousand Oaks, CA: Sage.

Coyne, I., & Cowley, S. (2010). In M. V. Lichtman (Ed.), *Understanding and Evaluating Qualitative Educational Research,* pp. 60-76. Thousand Oaks, CA: Sage.

Glaser, B. G. (1978). Theoretical sensitivity. Mill Valley, CA: Sociology Press.

Glaser, B. G. (1992). Basics of grounded theory analysis. Mill Valley, CA: Sociology Press.

Glaser, B. G. (1998). *Doing Grounded Theory: Issues and Discussions.* Sociology Press, Mill Valley, CA.
